# Supplementary material
Source: PubMed Central journal article supplement (PMC5694895)
Supplement: NIHMS917508-supplement-supplemental.pdf [file NIHMS917508-supplement-supplemental.pdf]

## Supporting information

### Aqueous RAFT Synthesis of Glycopolymers for Determination of Saccharide Structure and Concentration Effects on Amyloid $\beta$ Aggregation

*Pradipta K Das*<sup>1</sup>, *Dexter N Dean*<sup>2</sup>, *April L Fogel*<sup>1</sup>, *Fei Liu*<sup>3</sup>, *Brooks A Abel*<sup>1</sup>, *Charles L McCormick*<sup>1</sup>, *Eugenia Kharlampieva*<sup>3</sup>, *Vijayaraghavan Rangachari*<sup>2</sup>, and *Sarah E. Morgan*<sup>1\*</sup>

<sup>1</sup>School of Polymers and High Performance Materials, and <sup>2</sup>Department of Chemistry and Biochemistry, The University of Southern Mississippi, Hattiesburg, Mississippi 39406-5050

<sup>3</sup>Department of Chemistry, University of Alabama Birmingham, Birmingham, Alabama 35294

\*Corresponding author, [sarah.morgan@usm.edu](mailto:sarah.morgan@usm.edu)

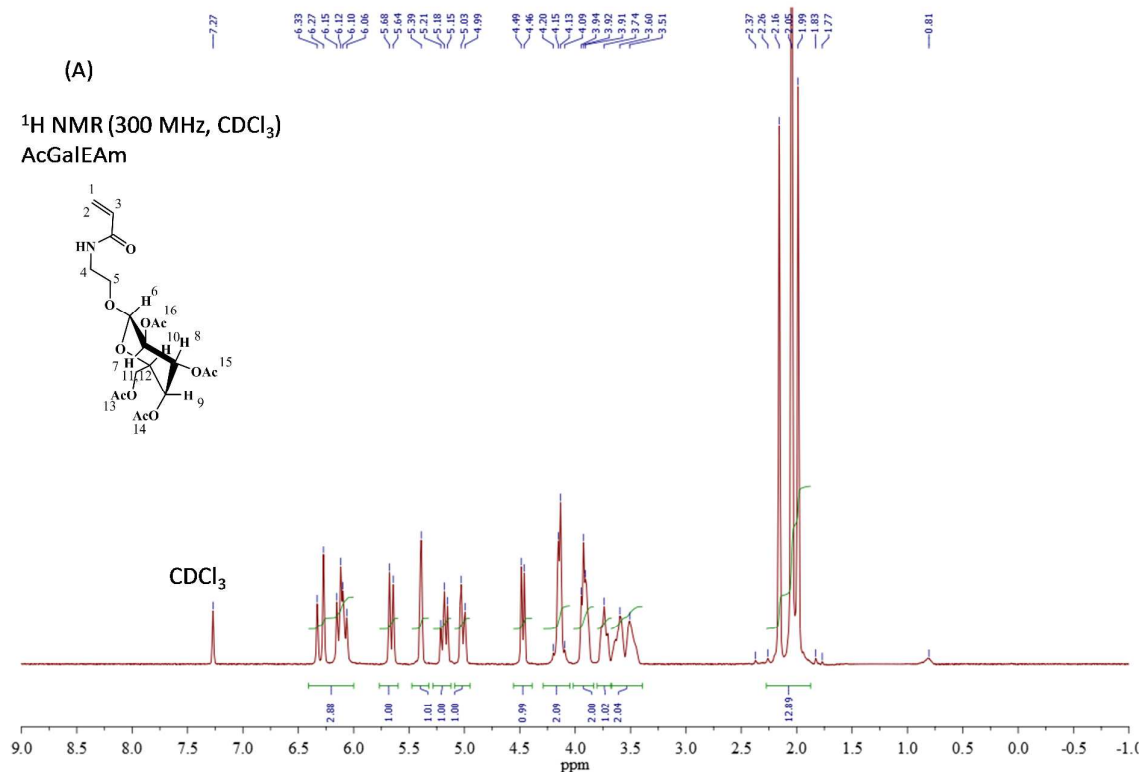

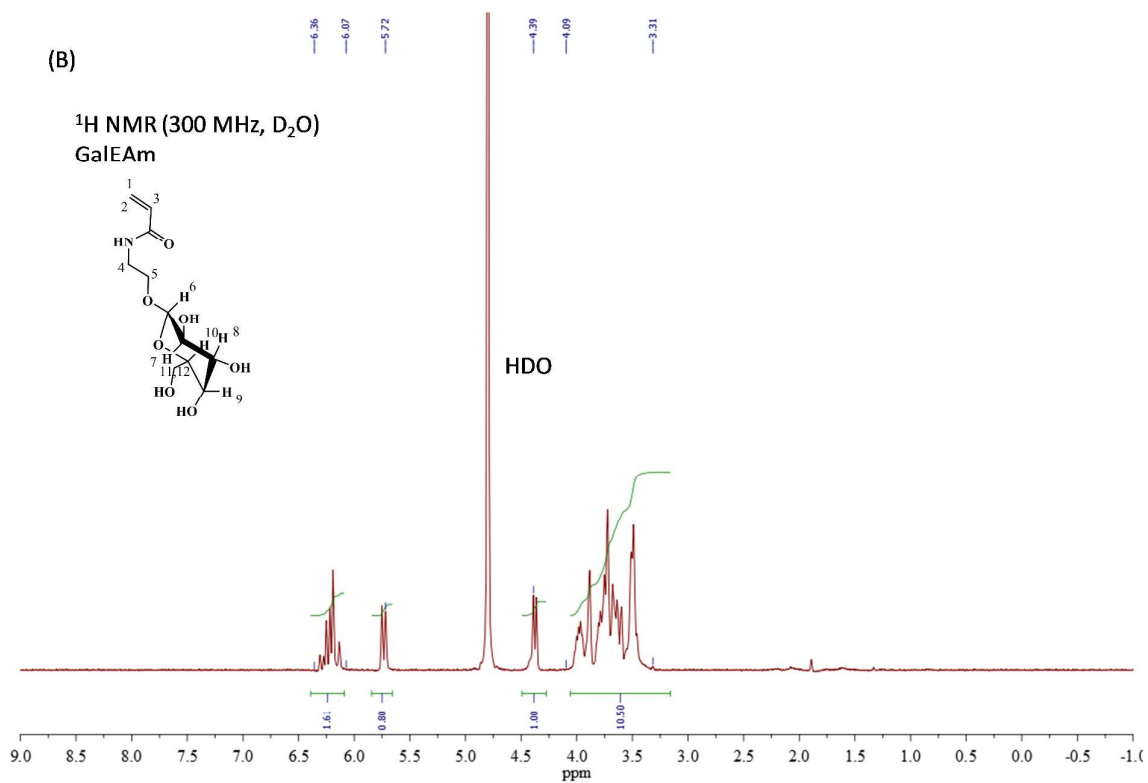

**Figure S1.**  $^1\text{H}$  NMR spectra of (A) AcGalEAm and (B) GalEAm

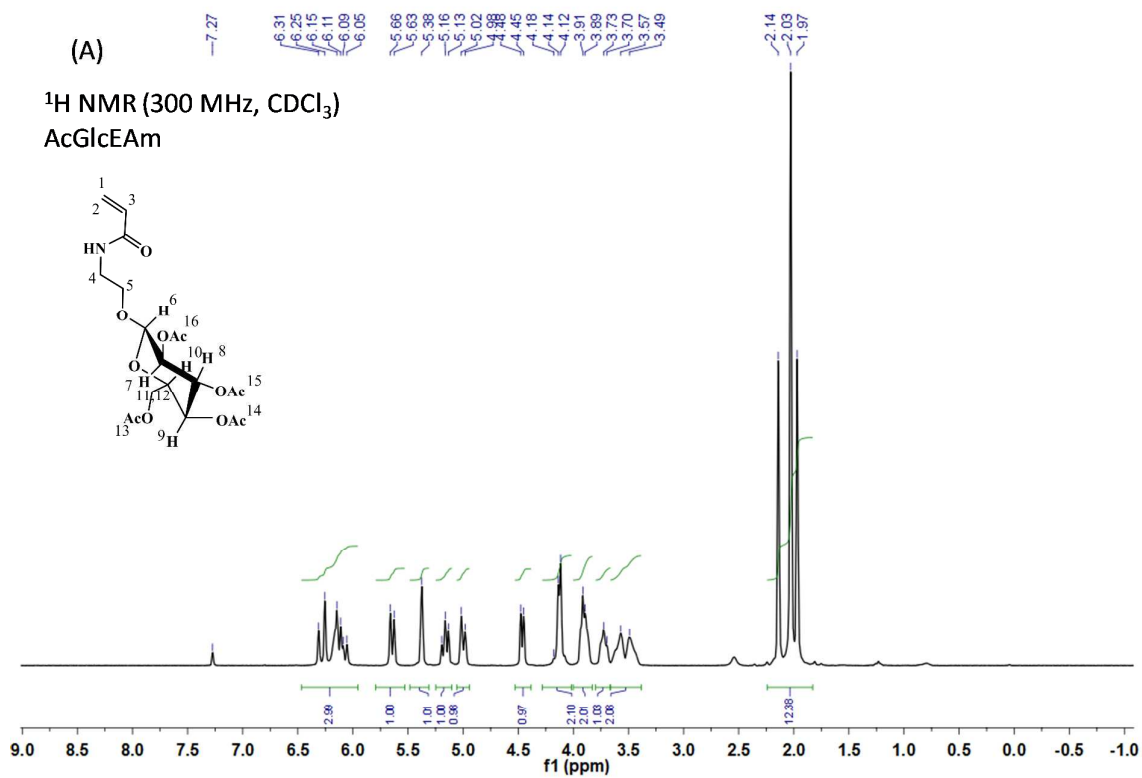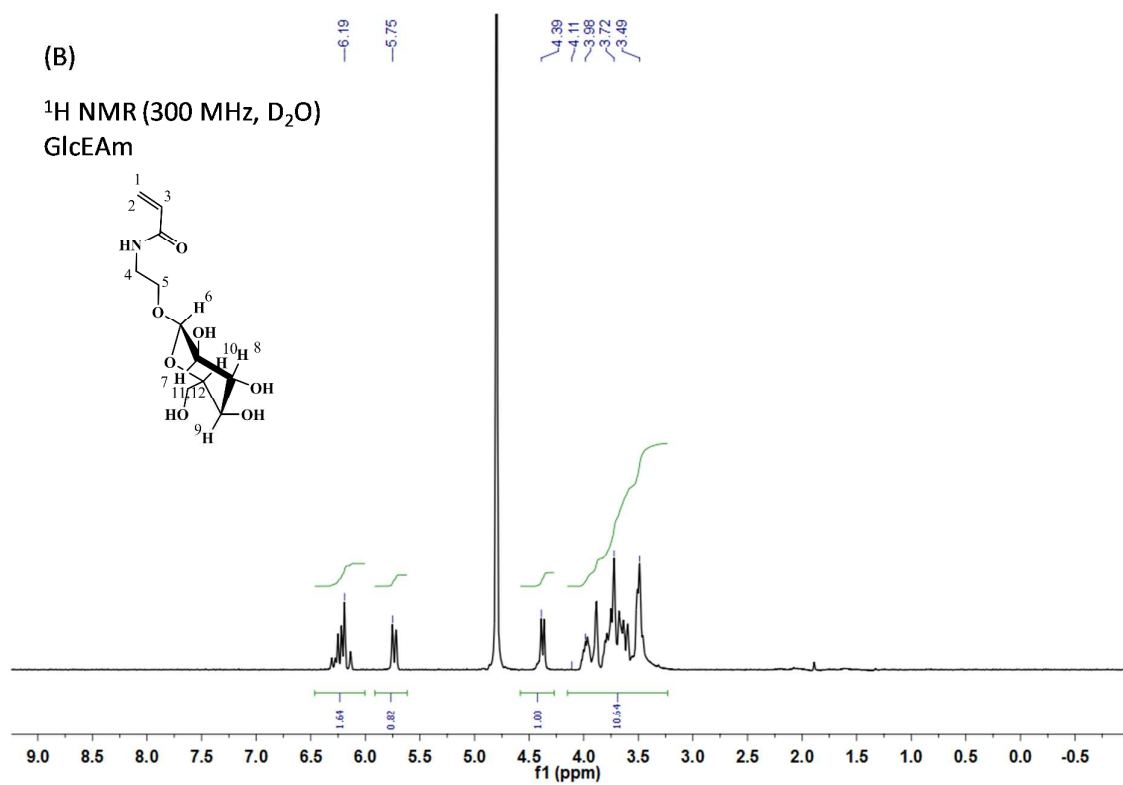

Figure S2.  $^1\text{H}$  NMR spectra of (A) AcGlcEAm and (B) GlcEAm

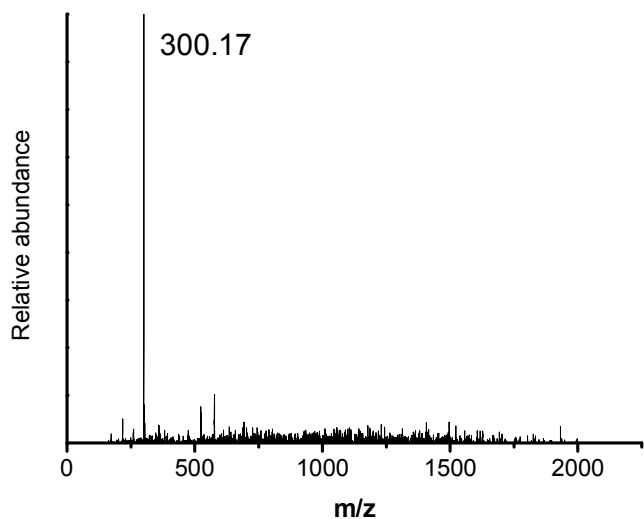

**Figure S3.** ESI-MS of GalEAm monomer [277.27+22.98 (Na<sup>+</sup>)]

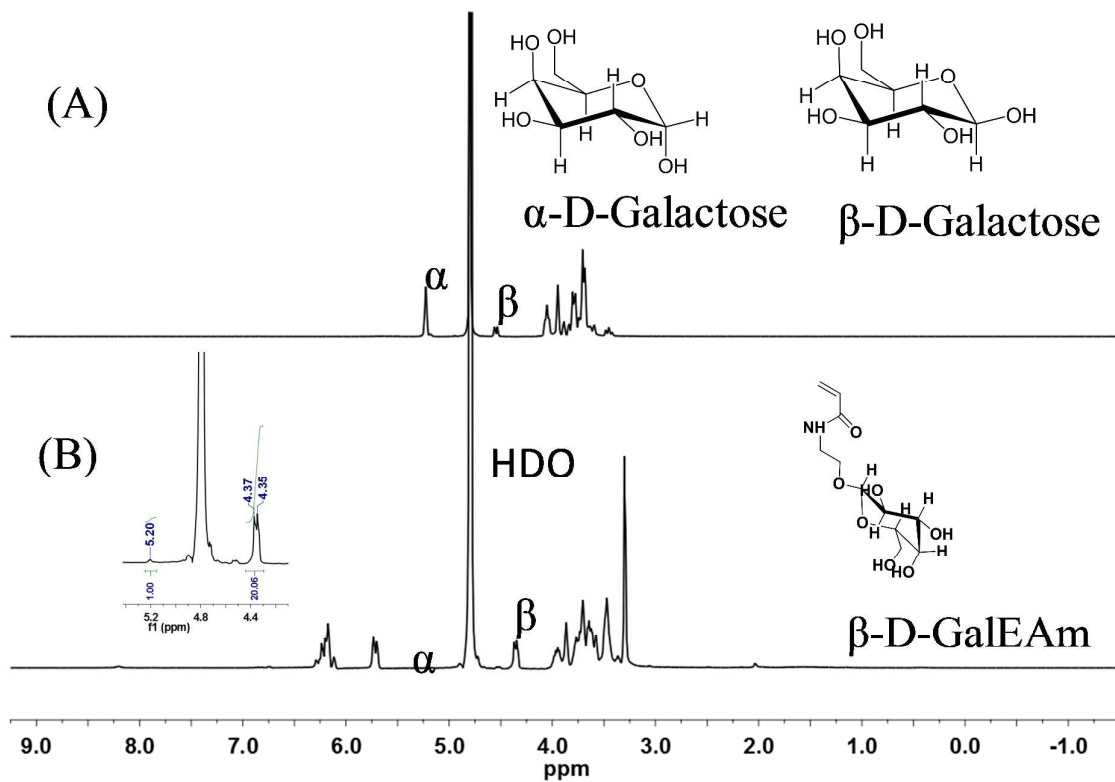

**Figure S4.** <sup>1</sup>H NMR spectra of (A) D-Galactose (commercially available from Sigma, racemic mixture of  $\alpha$ -D-galactose and  $\beta$ -D-galactose) and (B) GalEAm monomer
